# Supplementary material
Source: PubMed Central journal article supplement (PMC2838624)
Supplement: jn.109.118539_1.pdf [file jn.109.118539_1.pdf]

## Online Supporting Material

Supplemental Table 1. Percentiles ( $\pm$  SE) of Calcium intake from the Diet Alone and Total Calcium Intake (dietary and supplemental sources) by Dietary Reference Intake Gender and Age Groups in the United States 2003-2006<sup>1</sup>

|                |           |     | Calcium (mg/d) Diet - Only                          |              |              |               |               |                |                |
|----------------|-----------|-----|-----------------------------------------------------|--------------|--------------|---------------|---------------|----------------|----------------|
| <b>Males</b>   | Age (y)   | n   | <b>1</b>                                            | <b>5</b>     | <b>25</b>    | <b>50</b>     | <b>75</b>     | <b>95</b>      | <b>99</b>      |
|                | 1-3       | 405 | 341 $\pm$ 23                                        | 485 $\pm$ 19 | 747 $\pm$ 18 | 965 $\pm$ 26  | 1213 $\pm$ 41 | 1622 $\pm$ 72  | 1967 $\pm$ 103 |
|                | 4-8       | 431 | 452 $\pm$ 43                                        | 602 $\pm$ 32 | 843 $\pm$ 26 | 1034 $\pm$ 29 | 1248 $\pm$ 39 | 1591 $\pm$ 60  | 1866 $\pm$ 79  |
|                | 9-13      | 522 | 466 $\pm$ 58                                        | 607 $\pm$ 52 | 846 $\pm$ 38 | 1046 $\pm$ 32 | 1269 $\pm$ 39 | 1645 $\pm$ 77  | 1937 $\pm$ 117 |
|                | 14-18     | 654 | 385 $\pm$ 43                                        | 560 $\pm$ 41 | 895 $\pm$ 35 | 1195 $\pm$ 34 | 1562 $\pm$ 51 | 2214 $\pm$ 103 | 2768 $\pm$ 157 |
|                | 19-30     | 549 | 443 $\pm$ 32                                        | 592 $\pm$ 31 | 875 $\pm$ 28 | 1137 $\pm$ 29 | 1462 $\pm$ 46 | 2070 $\pm$ 101 | 2620 $\pm$ 159 |
|                | 31-50     | 758 | 396 $\pm$ 28                                        | 567 $\pm$ 29 | 817 $\pm$ 27 | 1062 $\pm$ 25 | 1357 $\pm$ 30 | 1885 $\pm$ 56  | 2334 $\pm$ 84  |
|                | 51-70     | 614 | 315 $\pm$ 19                                        | 436 $\pm$ 20 | 671 $\pm$ 18 | 890 $\pm$ 18  | 1161 $\pm$ 26 | 1674 $\pm$ 56  | 2130 $\pm$ 91  |
|                | $\geq$ 71 | 368 | 317 $\pm$ 19                                        | 428 $\pm$ 17 | 636 $\pm$ 17 | 823 $\pm$ 22  | 1055 $\pm$ 35 | 1474 $\pm$ 66  | 1841 $\pm$ 100 |
| <b>Females</b> | 1-3       | 384 | 382 $\pm$ 30                                        | 517 $\pm$ 26 | 751 $\pm$ 22 | 939 $\pm$ 27  | 1152 $\pm$ 38 | 1501 $\pm$ 62  | 1781 $\pm$ 86  |
|                | 4-8       | 468 | 385 $\pm$ 32                                        | 512 $\pm$ 30 | 736 $\pm$ 23 | 919 $\pm$ 25  | 1136 $\pm$ 38 | 1495 $\pm$ 74  | 1777 $\pm$ 105 |
|                | 9-13      | 525 | 386 $\pm$ 66                                        | 511 $\pm$ 58 | 736 $\pm$ 44 | 927 $\pm$ 42  | 1158 $\pm$ 62 | 1558 $\pm$ 124 | 1894 $\pm$ 193 |
|                | 14-18     | 643 | 312 $\pm$ 35                                        | 430 $\pm$ 33 | 645 $\pm$ 26 | 837 $\pm$ 24  | 1064 $\pm$ 36 | 1459 $\pm$ 75  | 1779 $\pm$ 113 |
|                | 19-30     | 481 | 322 $\pm$ 36                                        | 437 $\pm$ 33 | 629 $\pm$ 26 | 799 $\pm$ 24  | 1004 $\pm$ 35 | 1369 $\pm$ 71  | 1670 $\pm$ 109 |
|                | 31-50     | 693 | 289 $\pm$ 23                                        | 400 $\pm$ 22 | 613 $\pm$ 16 | 811 $\pm$ 17  | 1056 $\pm$ 31 | 1505 $\pm$ 70  | 1910 $\pm$ 114 |
|                | 51-70     | 610 | 290 $\pm$ 15                                        | 392 $\pm$ 17 | 581 $\pm$ 19 | 750 $\pm$ 22  | 952 $\pm$ 28  | 1315 $\pm$ 44  | 1629 $\pm$ 60  |
|                | $\geq$ 71 | 332 | 250 $\pm$ 15                                        | 346 $\pm$ 15 | 532 $\pm$ 15 | 703 $\pm$ 16  | 914 $\pm$ 22  | 1303 $\pm$ 41  | 1647 $\pm$ 64  |
|                |           |     | Total Calcium (mg/d) (Diet and Dietary Supplements) |              |              |               |               |                |                |
| <b>Males</b>   | Age (y)   | n   | <b>1</b>                                            | <b>5</b>     | <b>25</b>    | <b>50</b>     | <b>75</b>     | <b>95</b>      | <b>99</b>      |
|                | 1-3       | 405 | 373 $\pm$ 35                                        | 514 $\pm$ 29 | 740 $\pm$ 29 | 970 $\pm$ 30  | 1218 $\pm$ 54 | 1605 $\pm$ 90  | 2102 $\pm$ 237 |
|                | 4-8       | 431 | 460 $\pm$ 53                                        | 636 $\pm$ 54 | 875 $\pm$ 30 | 1070 $\pm$ 34 | 1248 $\pm$ 53 | 1633 $\pm$ 60  | 2044 $\pm$ 163 |
|                | 9-13      | 522 | 472 $\pm$ 63                                        | 613 $\pm$ 63 | 877 $\pm$ 35 | 1070 $\pm$ 47 | 1279 $\pm$ 38 | 1665 $\pm$ 74  | 2125 $\pm$ 125 |
|                | 14-18     | 654 | 423 $\pm$ 61                                        | 592 $\pm$ 62 | 905 $\pm$ 40 | 1210 $\pm$ 42 | 1584 $\pm$ 54 | 2440 $\pm$ 149 | 3058 $\pm$ 219 |

Online Supporting Material

|                |       |     |          |          |          |           |           |            |            |
|----------------|-------|-----|----------|----------|----------|-----------|-----------|------------|------------|
|                | 19-30 | 549 | 459 ± 30 | 595 ± 39 | 890 ± 36 | 1166 ± 41 | 1545 ± 52 | 2159 ± 162 | 2687 ± 175 |
|                | 31-50 | 758 | 440 ± 79 | 574 ± 29 | 874 ± 28 | 1140 ± 29 | 1487 ± 47 | 2165 ± 67  | 2706 ± 220 |
|                | 51-70 | 614 | 350 ± 24 | 464 ± 21 | 737 ± 20 | 993 ± 21  | 1321 ± 31 | 2022 ± 128 | 2743 ± 205 |
|                | ≥ 71  | 368 | 339 ± 27 | 455 ± 20 | 740 ± 30 | 967 ± 29  | 1282 ± 37 | 2015 ± 71  | 3060 ± 412 |
| <b>Females</b> | 1-3   | 384 | 397 ± 38 | 545 ± 24 | 775 ± 32 | 947 ± 31  | 1136 ± 33 | 1548 ± 86  | 1825 ± 125 |
|                | 4-8   | 468 | 435 ± 32 | 534 ± 35 | 756 ± 32 | 913 ± 28  | 1144 ± 47 | 1541 ± 46  | 1891 ± 123 |
|                | 9-13  | 525 | 389 ± 61 | 498 ± 53 | 749 ± 50 | 942 ± 39  | 1200 ± 61 | 1588 ± 122 | 2086 ± 280 |
|                | 14-18 | 643 | 301 ± 29 | 431 ± 37 | 663 ± 29 | 867 ± 41  | 1100 ± 56 | 1608 ± 118 | 2008 ± 105 |
|                | 19-30 | 481 | 314 ± 52 | 437 ± 39 | 660 ± 31 | 863 ± 22  | 1095 ± 51 | 1671 ± 138 | 2551 ± 349 |
|                | 31-50 | 693 | 326 ± 16 | 442 ± 22 | 691 ± 21 | 934 ± 26  | 1275 ± 57 | 2099 ± 152 | 2662 ± 128 |
|                | 51-70 | 610 | 280 ± 36 | 440 ± 23 | 709 ± 34 | 1044 ± 44 | 1487 ± 56 | 2364 ± 110 | 3698 ± 793 |
|                | ≥ 71  | 332 | 290 ± 22 | 385 ± 32 | 664 ± 19 | 983 ± 36  | 1475 ± 47 | 2298 ± 149 | 3072 ± 203 |

<sup>1</sup>Data are presented as percentile ± SE

Online Supporting Material

Supplemental Table 2. Percentiles ( $\pm$  SE) of vitamin D intake from the Diet Alone and Total vitamin D Intake (dietary and supplemental sources) by Dietary Reference Intake Gender and Age Groups in the United States 2005-2006<sup>1</sup>

| Males          | Age (y)   | n   | Vitamin D ( $\mu\text{g/d}$ ) Diet - Only                          |               |               |               |                |                |                |
|----------------|-----------|-----|--------------------------------------------------------------------|---------------|---------------|---------------|----------------|----------------|----------------|
|                |           |     | 1                                                                  | 5             | 25            | 50            | 75             | 95             | 99             |
|                | 1-3       | 405 | 1.4 $\pm$ 0.3                                                      | 2.4 $\pm$ 0.3 | 4.8 $\pm$ 0.2 | 6.8 $\pm$ 0.2 | 9.3 $\pm$ 0.3  | 13.2 $\pm$ 0.5 | 16.7 $\pm$ 0.8 |
|                | 4-8       | 431 | 1.5 $\pm$ 0.3                                                      | 2.5 $\pm$ 0.3 | 4.4 $\pm$ 0.3 | 6.1 $\pm$ 0.3 | 8.0 $\pm$ 0.3  | 11.2 $\pm$ 0.6 | 14.0 $\pm$ 0.9 |
|                | 9-13      | 522 | 1.2 $\pm$ 0.4                                                      | 2.1 $\pm$ 0.4 | 3.7 $\pm$ 0.4 | 5.2 $\pm$ 0.3 | 7.2 $\pm$ 0.3  | 10.6 $\pm$ 0.8 | 13.8 $\pm$ 1.4 |
|                | 14-18     | 654 | 0.6 $\pm$ 0.2                                                      | 1.2 $\pm$ 0.2 | 2.9 $\pm$ 0.3 | 5.0 $\pm$ 0.3 | 8.1 $\pm$ 0.5  | 14.7 $\pm$ 1.2 | 21.5 $\pm$ 2.0 |
|                | 19-30     | 549 | 0.8 $\pm$ 0.2                                                      | 1.3 $\pm$ 0.2 | 2.6 $\pm$ 0.3 | 4.1 $\pm$ 0.3 | 6.5 $\pm$ 0.4  | 12.2 $\pm$ 1.2 | 17.5 $\pm$ 1.5 |
|                | 31-50     | 758 | 0.9 $\pm$ 0.1                                                      | 1.5 $\pm$ 0.2 | 3.0 $\pm$ 0.2 | 4.6 $\pm$ 0.2 | 7.0 $\pm$ 0.4  | 12.1 $\pm$ 0.8 | 17.5 $\pm$ 1.5 |
|                | 51-70     | 614 | 1.0 $\pm$ 0.2                                                      | 1.6 $\pm$ 0.2 | 3.0 $\pm$ 0.3 | 4.5 $\pm$ 0.3 | 6.5 $\pm$ 0.4  | 10.8 $\pm$ 0.9 | 15.3 $\pm$ 1.5 |
|                | $\geq$ 71 | 368 | 1.4 $\pm$ 0.3                                                      | 2.1 $\pm$ 0.3 | 3.6 $\pm$ 0.3 | 5.1 $\pm$ 0.4 | 7.0 $\pm$ 0.6  | 10.7 $\pm$ 1.1 | 14.2 $\pm$ 1.7 |
| <b>Females</b> | 1-3       | 384 | 1.5 $\pm$ 0.3                                                      | 2.5 $\pm$ 0.3 | 4.6 $\pm$ 0.3 | 6.4 $\pm$ 0.4 | 8.7 $\pm$ 0.5  | 12.8 $\pm$ 1.0 | 16.4 $\pm$ 1.4 |
|                | 4-8       | 468 | 1.4 $\pm$ 0.2                                                      | 2.2 $\pm$ 0.2 | 3.8 $\pm$ 0.2 | 5.2 $\pm$ 0.2 | 6.8 $\pm$ 0.4  | 9.6 $\pm$ 0.6  | 12.0 $\pm$ 0.9 |
|                | 9-13      | 525 | 1.1 $\pm$ 0.6                                                      | 1.8 $\pm$ 0.6 | 3.3 $\pm$ 0.5 | 4.8 $\pm$ 0.5 | 6.8 $\pm$ 0.8  | 10.6 $\pm$ 1.8 | 13.8 $\pm$ 2.9 |
|                | 14-18     | 643 | 0.7 $\pm$ 0.3                                                      | 1.1 $\pm$ 0.3 | 2.0 $\pm$ 0.3 | 3.3 $\pm$ 0.3 | 4.9 $\pm$ 0.3  | 8.4 $\pm$ 0.7  | 12.4 $\pm$ 1.9 |
|                | 19-30     | 481 | 0.6 $\pm$ 0.2                                                      | 1.1 $\pm$ 0.3 | 2.0 $\pm$ 0.3 | 3.1 $\pm$ 0.3 | 4.6 $\pm$ 0.3  | 8.0 $\pm$ 0.9  | 11.5 $\pm$ 1.2 |
|                | 31-50     | 693 | 0.6 $\pm$ 0.1                                                      | 1.1 $\pm$ 0.2 | 2.2 $\pm$ 0.2 | 3.6 $\pm$ 0.2 | 5.7 $\pm$ 0.4  | 10.5 $\pm$ 0.9 | 16.0 $\pm$ 1.7 |
|                | 51-70     | 610 | 0.8 $\pm$ 0.1                                                      | 1.3 $\pm$ 0.2 | 2.3 $\pm$ 0.2 | 3.4 $\pm$ 0.3 | 4.9 $\pm$ 0.5  | 8.2 $\pm$ 1.2  | 11.5 $\pm$ 2.0 |
|                | $\geq$ 71 | 332 | 0.8 $\pm$ 0.1                                                      | 1.3 $\pm$ 0.2 | 2.6 $\pm$ 0.2 | 4.0 $\pm$ 0.2 | 5.8 $\pm$ 0.3  | 9.2 $\pm$ 0.5  | 12.6 $\pm$ 0.8 |
|                |           |     | Total Vitamin D ( $\mu\text{g/d}$ ) (Diet and Dietary Supplements) |               |               |               |                |                |                |
| <b>Males</b>   | Age (y)   | n   | 1                                                                  | 5             | 25            | 50            | 75             | 95             | 99             |
|                | 1-3       | 405 | 1.2 $\pm$ 0.4                                                      | 2.7 $\pm$ 0.5 | 5.5 $\pm$ 0.4 | 8.3 $\pm$ 0.5 | 12.1 $\pm$ 0.7 | 20.1 $\pm$ 2.0 | 22.1 $\pm$ 1.2 |
|                | 4-8       | 431 | 1.7 $\pm$ 0.8                                                      | 3.1 $\pm$ 0.5 | 5.6 $\pm$ 0.3 | 7.8 $\pm$ 0.7 | 12.2 $\pm$ 0.9 | 19.4 $\pm$ 0.6 | 24.9 $\pm$ 3.2 |
|                | 9-13      | 522 | 1.4 $\pm$ 0.3                                                      | 2.3 $\pm$ 0.5 | 4.3 $\pm$ 0.4 | 6.1 $\pm$ 0.3 | 8.3 $\pm$ 1.3  | 15.0 $\pm$ 1.0 | 21.4 $\pm$ 5.5 |
|                | 14-18     | 654 | 0.8 $\pm$ 0.1                                                      | 1.2 $\pm$ 0.3 | 2.8 $\pm$ 0.3 | 5.8 $\pm$ 0.6 | 9.2 $\pm$ 1.0  | 17.8 $\pm$ 1.8 | 25.6 $\pm$ 2.5 |
|                | 19-30     | 549 | 0.7 $\pm$ 0.2                                                      | 1.3 $\pm$ 0.3 | 2.5 $\pm$ 0.3 | 4.8 $\pm$ 0.5 | 9.2 $\pm$ 0.6  | 17.8 $\pm$ 1.9 | 25.6 $\pm$ 3.9 |
|                | 31-50     | 758 | 1.0 $\pm$ 0.1                                                      | 1.8 $\pm$ 0.2 | 3.6 $\pm$ 0.3 | 6.4 $\pm$ 0.6 | 11.2 $\pm$ 0.6 | 18.1 $\pm$ 0.6 | 25.0 $\pm$ 3.1 |
|                | 51-70     | 614 | 1.1 $\pm$ 0.3                                                      | 1.6 $\pm$ 0.2 | 3.4 $\pm$ 0.3 | 6.5 $\pm$ 0.5 | 13.2 $\pm$ 0.6 | 19.5 $\pm$ 2.4 | 24.7 $\pm$ 8.8 |

Online Supporting Material

|                |       |     |           |           |           |           |            |            |            |
|----------------|-------|-----|-----------|-----------|-----------|-----------|------------|------------|------------|
| <b>Females</b> | ≥ 71  | 368 | 1.5 ± 0.4 | 2.7 ± 0.3 | 4.9 ± 0.5 | 8.4 ± 0.8 | 14.9 ± 0.5 | 21.1 ± 2.8 | 38.8 ± 45  |
|                | 1-3   | 384 | 1.8 ± 0.5 | 3.2 ± 0.6 | 5.2 ± 0.6 | 7.6 ± 0.8 | 10.4 ± 0.6 | 16.9 ± 1.1 | 21.6 ± 1.9 |
|                | 4-8   | 468 | 1.6 ± 0.4 | 2.6 ± 0.3 | 4.4 ± 0.4 | 6.4 ± 0.4 | 9.8 ± 1.4  | 16.8 ± 1.5 | 47.2 ± 24  |
|                | 9-13  | 525 | 0.9 ± 0.6 | 1.6 ± 0.7 | 3.3 ± 0.7 | 5.4 ± 0.6 | 8.9 ± 1.9  | 18.9 ± 3.9 | 25.6 ± 57  |
|                | 14-18 | 643 | 0.7 ± 0.2 | 1.1 ± 0.3 | 2.1 ± 0.5 | 3.6 ± 0.3 | 6.3 ± 1.0  | 14.2 ± 1.1 | 17.4 ± 1.8 |
|                | 19-30 | 481 | 0.4 ± 0.2 | 0.8 ± 0.3 | 2.1 ± 0.3 | 3.9 ± 0.4 | 7.7 ± 0.5  | 16.0 ± 1.8 | 24.9 ± 3.5 |
|                | 31-50 | 693 | 0.6 ± 0.1 | 0.9 ± 0.1 | 2.6 ± 0.3 | 5.8 ± 0.5 | 11.8 ± 0.9 | 19.6 ± 1.5 | 24.6 ± 2.2 |
|                | 51-70 | 610 | 0.9 ± 0.2 | 1.6 ± 0.3 | 3.4 ± 0.4 | 7.7 ± 0.9 | 14.0 ± 0.7 | 23.4 ± 2.2 | 72.7 ± 39  |
|                | ≥ 71  | 332 | 0.8 ± 0.3 | 2.0 ± 0.2 | 3.7 ± 0.3 | 8.9 ± 0.9 | 14.3 ± 0.8 | 23.5 ± 0.7 | 32.4 ± 3.2 |

<sup>1</sup>Data are presented as percentile ± SE
